# Supplementary material for: Assessing COVID-19 pandemic excess deaths in Brazil: years 2020 and 2021
Source: bioRxiv or medRxiv preprint supplement (doi:10.1101/2022.07.27.22278096), 2022-12-20
Supplement: Supplementary file [file media-2.pdf]

Maranhão (MA)

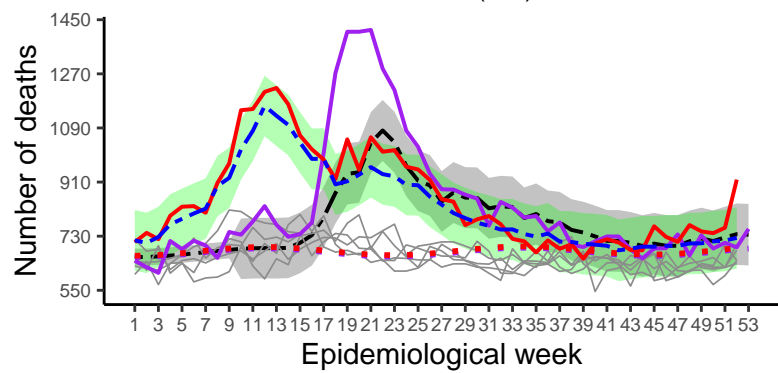

Piauí (PI)

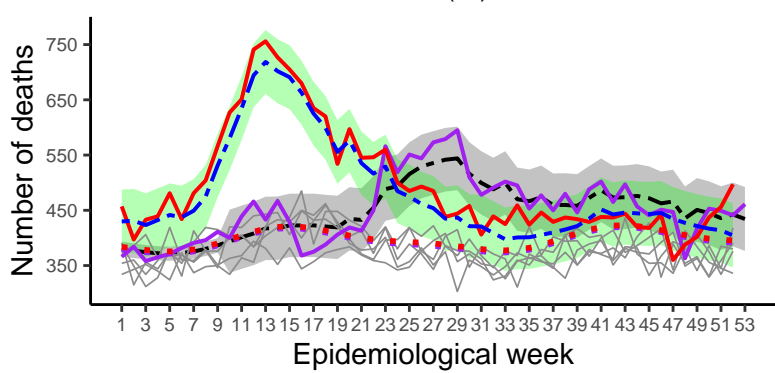

Ceará (CE)

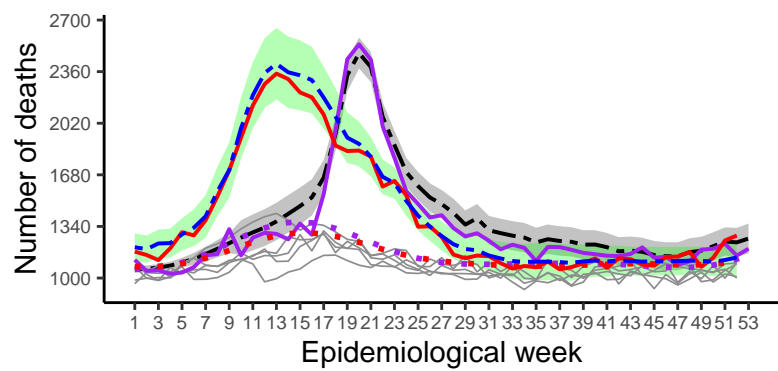

Rio Grande do Norte (RN)

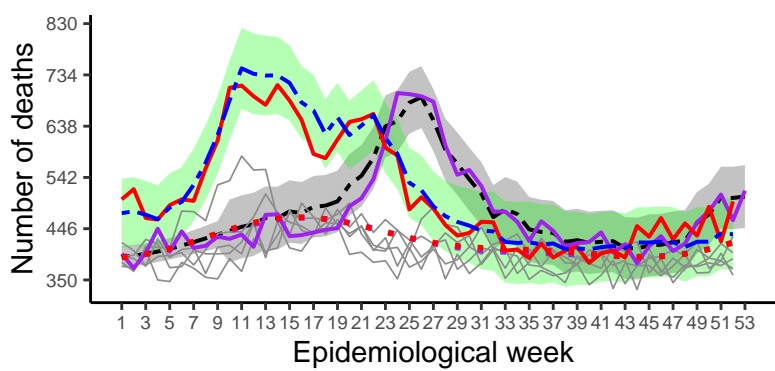

Paraíba (PB)

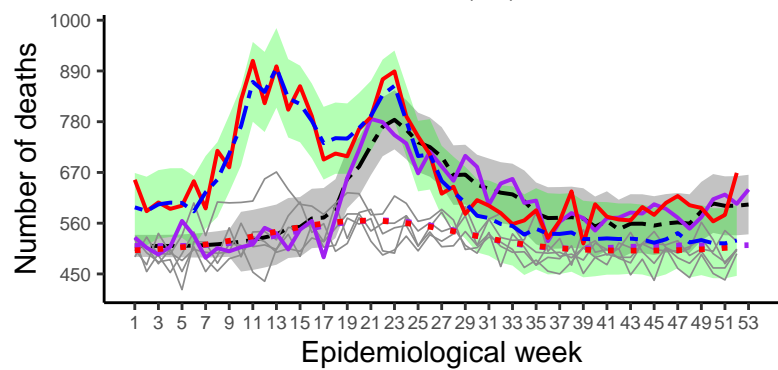

Pernambuco (PE)

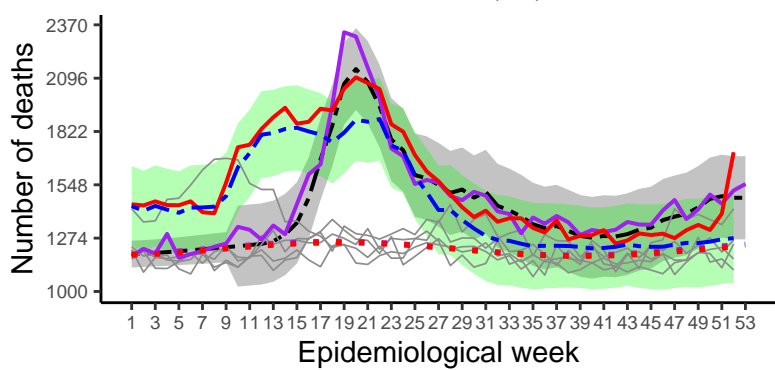

Alagoas (AL)

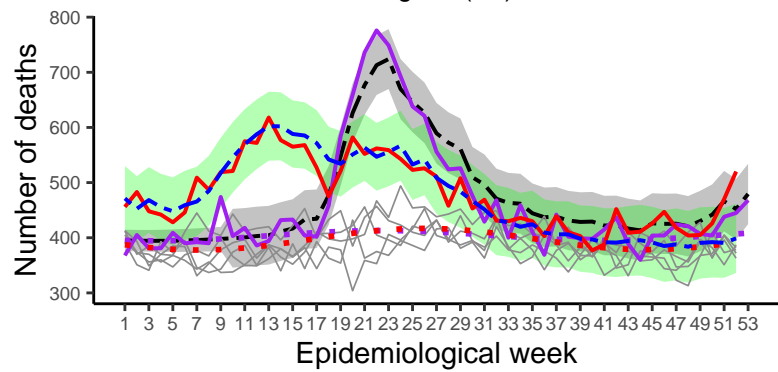

Sergipe (SE)

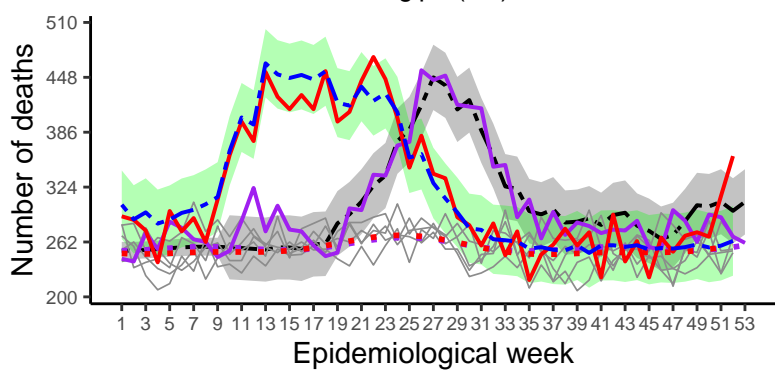

Bahia (BA)

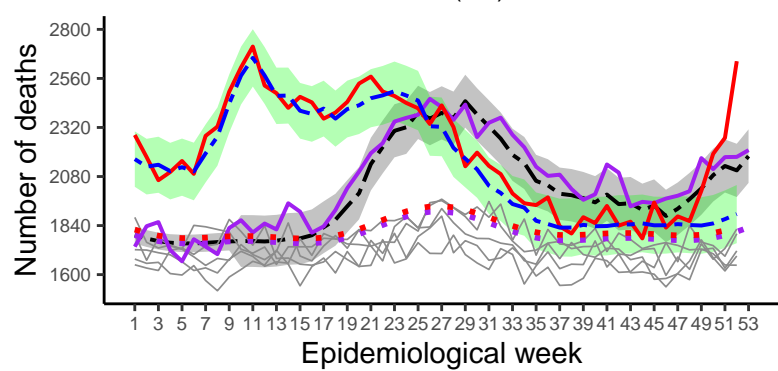

— 2015–2019 observed   
 ■ 2020 forecast   
 — 2020 observed   
 - - 2020 forecast+covid   
  2020 95% IP  
■ 2021 forecast   
 — 2021 observed   
 - - 2021 forecast+covid   
 2021 95% IP
