# Supplementary material for: Assessing COVID-19 pandemic excess deaths in Brazil: years 2020 and 2021
Source: bioRxiv or medRxiv preprint supplement (doi:10.1101/2022.07.27.22278096), 2022-12-20

Minas Gerais (MG)

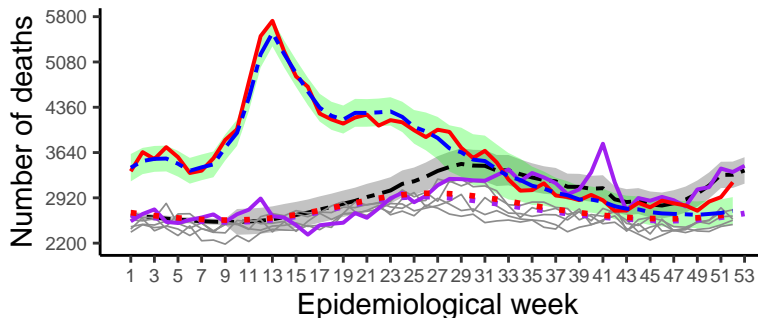

Espírito Santo (ES)

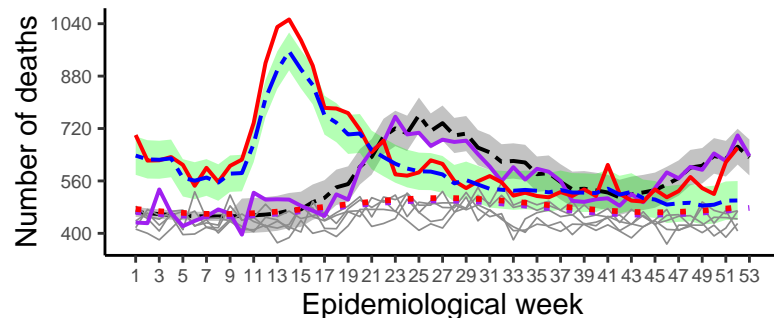

Rio de Janeiro (RJ)

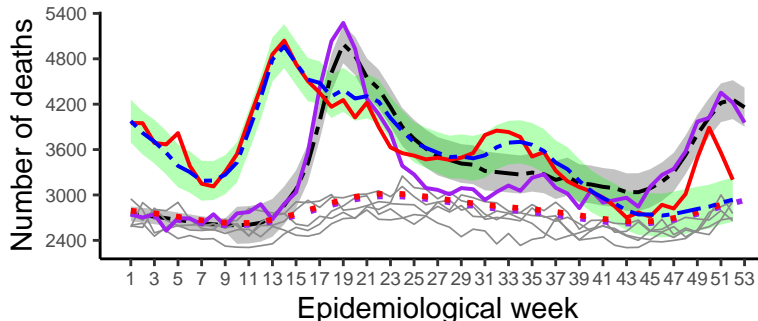

São Paulo (SP)

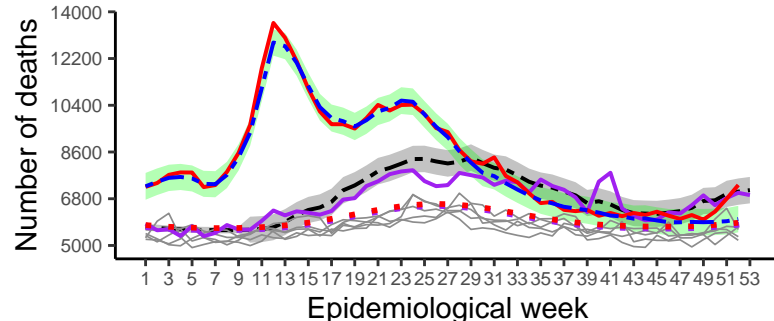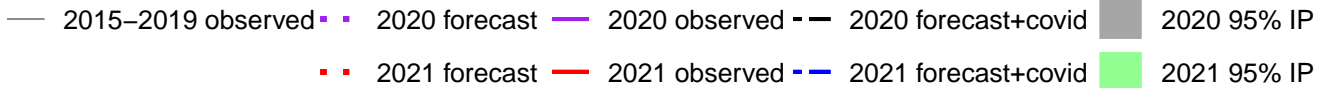

Supplement: Supplementary file [file media-3.pdf]
