# Supplementary material for: Assessing COVID-19 pandemic excess deaths in Brazil: years 2020 and 2021
Source: bioRxiv or medRxiv preprint supplement (doi:10.1101/2022.07.27.22278096), 2022-12-20

Paraná (PR)

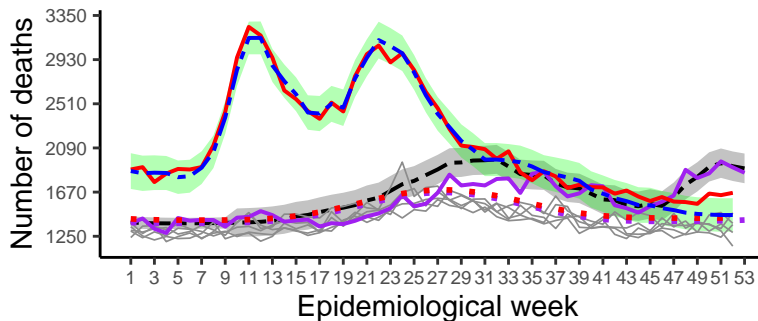

Santa Catarina (SC)

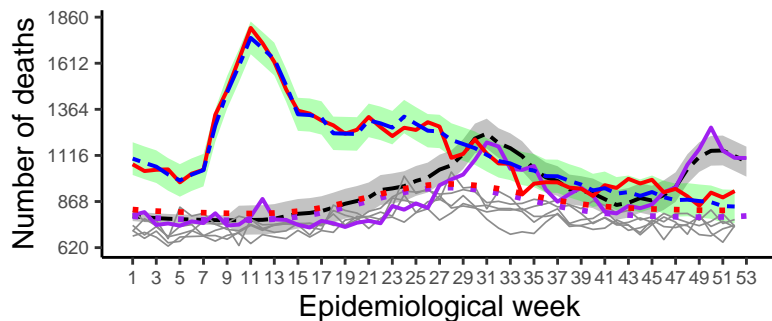

Rio Grande do Sul (RS)

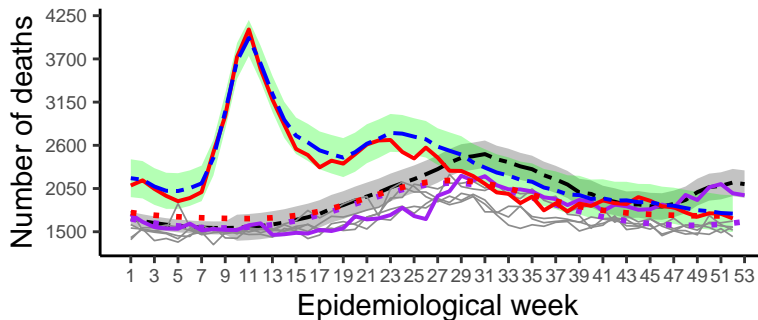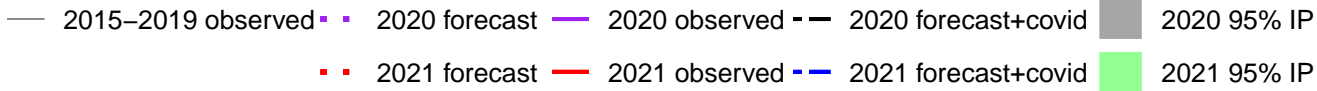

Supplement: Supplementary file [file media-4.pdf]
