# Supplementary material for: Assessing COVID-19 pandemic excess deaths in Brazil: years 2020 and 2021
Source: bioRxiv or medRxiv preprint supplement (doi:10.1101/2022.07.27.22278096), 2022-12-20
Supplement: Supplementary file [file media-5.pdf]

Mato Grosso do Sul (MS)

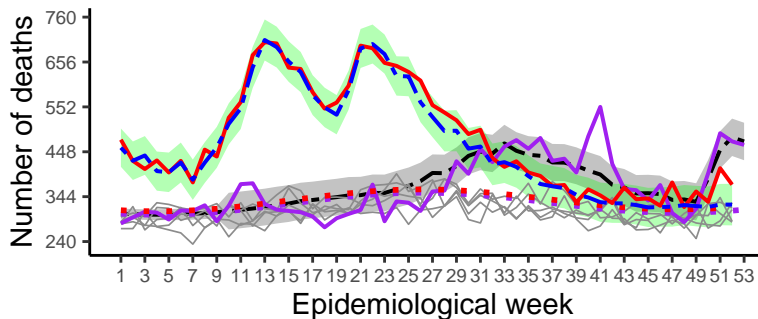

Mato Grosso (MT)

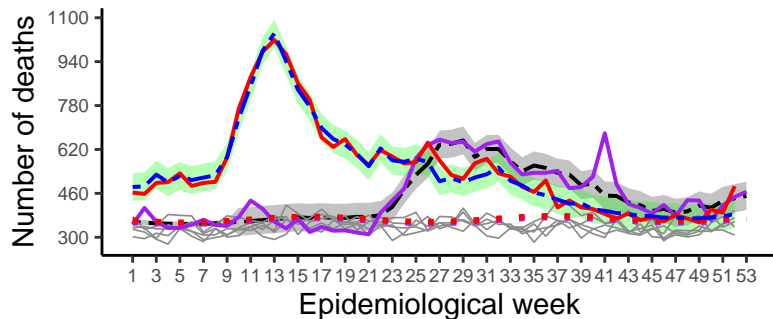

Goiás (GO)

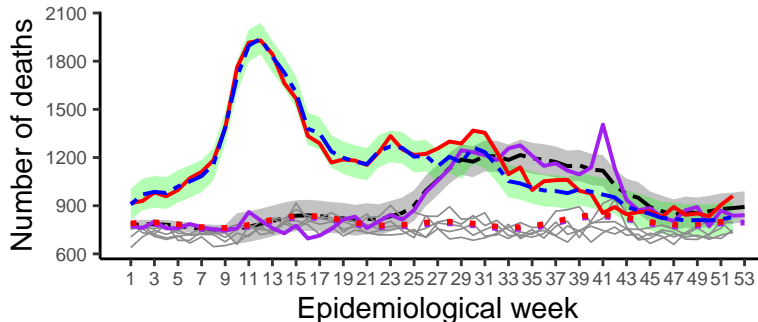

Federal District (DF)

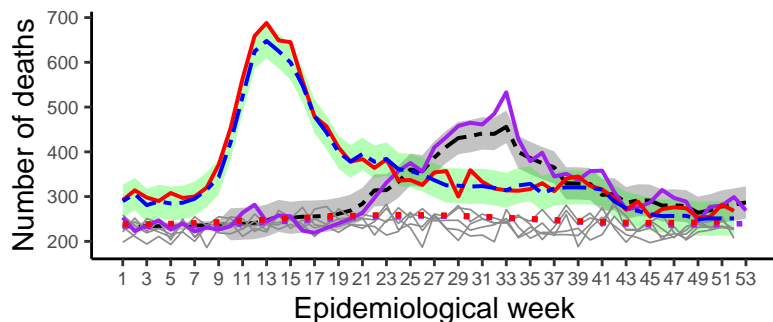

— 2015–2019 observed  
 — 2020 observed  
 - - 2020 forecast+covid  
  2020 95% IP  
- - 2021 forecast  
 — 2021 observed  
 - - 2021 forecast+covid  
  2021 95% IP
