# Supplementary material for: Assessing COVID-19 pandemic excess deaths in Brazil: years 2020 and 2021
Source: bioRxiv or medRxiv preprint supplement (doi:10.1101/2022.07.27.22278096), 2022-12-20
Supplement: Supplementary file [file media-8.pdf]

| Year | Region | State | COVID-19 | Reported | Expected | Excess  | 95% PI  |         | P-Score | Ratio <sub>EC</sub> |      |
|------|--------|-------|----------|----------|----------|---------|---------|---------|---------|---------------------|------|
| 2020 | N      | RO    | 1 910    | 9 024    | 7 068    | 1 956   | 1 699   | 2 213   | 27.7    | 1.02                |      |
|      |        | AC    | 819      | 4 208    | 3 627    | 581     | 367     | 795     | 16.0    | 0.71                |      |
|      |        | AM    | 6 003    | 21 816   | 15 802   | 6 014   | 5 475   | 6 552   | 38.1    | 1.00                |      |
|      |        | RR    | 809      | 3 135    | 2 565    | 570     | 385     | 755     | 22.2    | 0.70                |      |
|      |        | PA    | 7 941    | 45 173   | 35 542   | 9 631   | 8 589   | 10 673  | 27.1    | 1.21                |      |
|      |        | AP    | 1 117    | 4 031    | 3 120    | 911     | 783     | 1 040   | 29.2    | 0.82                |      |
|      |        | TO    | 1 181    | 8 022    | 6 984    | 1 038   | 696     | 1 380   | 14.9    | 0.88                |      |
|      | NE     | MA    | 5 153    | 37 723   | 29 797   | 7 926   | 6 140   | 9 713   | 26.6    | 1.54                |      |
|      |        | PI    | 2 822    | 20 494   | 17 510   | 2 984   | 2 287   | 3 682   | 17.0    | 1.06                |      |
|      |        | CE    | 11 883   | 60 363   | 51 109   | 9 254   | 7 498   | 11 011  | 18.1    | 0.78                |      |
|      |        | RN    | 3 109    | 21 287   | 18 561   | 2 726   | 1 729   | 3 722   | 14.7    | 0.88                |      |
|      |        | PB    | 3 554    | 26 871   | 23 268   | 3 603   | 2 487   | 4 719   | 15.5    | 1.01                |      |
|      |        | PE    | 11 499   | 66 627   | 53 765   | 12 862  | 8 047   | 17 676  | 23.9    | 1.12                |      |
|      |        | AL    | 3 607    | 20 861   | 17 777   | 3 084   | 2 048   | 4 119   | 17.4    | 0.85                |      |
|      |        | SE    | 2 360    | 13 626   | 11 296   | 2 330   | 1 872   | 2 789   | 20.6    | 0.99                |      |
|      | SE     | BA    | 11 041   | 92 747   | 79 306   | 13 441  | 11 377  | 15 505  | 17.0    | 1.22                |      |
|      |        | MG    | 13 672   | 130 816  | 119 271  | 11 545  | 8 401   | 14 689  | 9.7     | 0.84                |      |
|      |        | ES    | 4 886    | 25 382   | 20 931   | 4 451   | 3 717   | 5 185   | 21.3    | 0.91                |      |
|      |        | RJ    | 32 257   | 150 480  | 122 534  | 27 946  | 23 119  | 32 773  | 22.8    | 0.87                |      |
|      | S      | SP    | 47 898   | 303 735  | 262 729  | 41 006  | 33 818  | 48 194  | 15.6    | 0.86                |      |
|      |        | PR    | 8 848    | 71 329   | 65 464   | 5 865   | 3 225   | 8 505   | 9.0     | 0.66                |      |
|      |        | SC    | 5 387    | 40 223   | 36 885   | 3 338   | 2 084   | 4 591   | 9.1     | 0.62                |      |
|      | CW     | RS    | 9 406    | 79 933   | 78 864   | 1 069   | -2 283  | 4 421   | 1.4     | 0.11                |      |
|      |        | MS    | 2 289    | 16 606   | 14 477   | 2 129   | 1 455   | 2 803   | 14.7    | 0.93                |      |
|      |        | MT    | 4 412    | 20 513   | 15 895   | 4 618   | 4 025   | 5 210   | 29.1    | 1.05                |      |
|      |        | GO    | 7 646    | 41 999   | 34 735   | 7 264   | 5 722   | 8 806   | 20.9    | 0.95                |      |
|      | 2021   | N     | DF       | 3 111    | 14 296   | 10 835  | 3 461   | 3 020   | 3 901   | 31.9                | 1.11 |
|      |        |       | RO       | 4 854    | 13 887   | 8 360   | 5 527   | 5 218   | 5 835   | 66.1                | 1.14 |
| AC   |        |       | 1 291    | 5 467    | 4 415    | 1 052   | 812     | 1 291   | 23.8    | 0.81                |      |
| AM   |        |       | 8 577    | 28 832   | 19 015   | 9 817   | 9 208   | 10 426  | 51.6    | 1.14                |      |
| RR   |        |       | 1 218    | 4 239    | 3 259    | 980     | 695     | 1 266   | 30.1    | 0.80                |      |
| PA   |        |       | 10 356   | 52 017   | 42 538   | 9 479   | 8 169   | 10 789  | 22.3    | 0.92                |      |
| AP   |        |       | 1 062    | 4 747    | 3 810    | 937     | 793     | 1 081   | 24.6    | 0.88                |      |
| NE   |        | TO    | 2 671    | 11 477   | 8 350    | 3 127   | 2 648   | 3 607   | 37.5    | 1.17                |      |
|      |        | MA    | 7 446    | 44 449   | 35 385   | 9 064   | 7 065   | 11 063  | 25.6    | 1.22                |      |
|      |        | PI    | 4 444    | 25 886   | 20 703   | 5 183   | 4 384   | 5 982   | 25.0    | 1.17                |      |
|      |        | CE    | 15 665   | 73 459   | 59 239   | 14 220  | 10 294  | 18 145  | 24.0    | 0.91                |      |
|      |        | RN    | 4 950    | 26 562   | 21 909   | 4 653   | 3 134   | 6 172   | 21.2    | 0.94                |      |
|      |        | PB    | 5 930    | 34 558   | 27 293   | 7 265   | 5 492   | 9 039   | 26.6    | 1.23                |      |
|      |        | PE    | 12 716   | 80 406   | 63 153   | 17 253  | 11 837  | 22 669  | 27.3    | 1.36                |      |
|      |        | AL    | 4 174    | 24 918   | 20 455   | 4 463   | 2 702   | 6 225   | 21.8    | 1.07                |      |
| SE   |        | SE    | 3 458    | 16 624   | 13 228   | 3 396   | 2 797   | 3 995   | 25.7    | 0.98                |      |
|      |        | BA    | 16 867   | 114 698  | 94 655   | 20 043  | 16 955  | 23 131  | 21.2    | 1.19                |      |
|      |        | MG    | 44 198   | 188 518  | 141 739  | 46 779  | 41 854  | 51 704  | 33.0    | 1.06                |      |
|      |        | ES    | 6 239    | 32 664   | 24 944   | 7 720   | 6 554   | 8 886   | 31.0    | 1.24                |      |
| S    |        | RJ    | 40 531   | 188 007  | 145 351  | 42 656  | 35 780  | 49 531  | 29.4    | 1.05                |      |
|      |        | SP    | 110 138  | 429 427  | 311 564  | 117 863 | 109 869 | 125 857 | 37.8    | 1.07                |      |
|      |        | PR    | 32 824   | 112 182  | 77 921   | 34 261  | 29 653  | 38 869  | 44.0    | 1.04                |      |
| CW   |        | SC    | 14 565   | 59 368   | 44 678   | 146 90  | 12 751  | 16 630  | 32.9    | 1.01                |      |
|      |        | RS    | 26 715   | 116 877  | 95 349   | 21 528  | 15 857  | 27 200  | 22.6    | 0.81                |      |
|      |        | MS    | 6 790    | 24 814   | 17 312   | 7 502   | 6 413   | 8 591   | 43.3    | 1.10                |      |
|      |        | MT    | 9 172    | 28 476   | 19 014   | 9 462   | 8 802   | 10 122  | 49.8    | 1.03                |      |
|      |        | GO    | 17 972   | 60 394   | 41 430   | 18 964  | 16 886  | 21 042  | 45.8    | 1.06                |      |
|      |        | DF    | 5 370    | 18 784   | 12 924   | 5 860   | 5 203   | 6 517   | 45.3    | 1.09                |      |
