# Supplementary material for: Assessing COVID-19 pandemic excess deaths in Brazil: years 2020 and 2021
Source: bioRxiv or medRxiv preprint supplement (doi:10.1101/2022.07.27.22278096), 2022-12-20
Supplement: Supplementary file [file media-9.pdf]

Rondônia (RO)

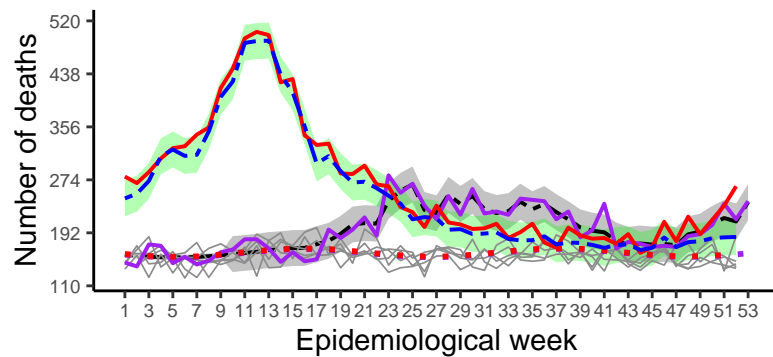

Acre (AC)

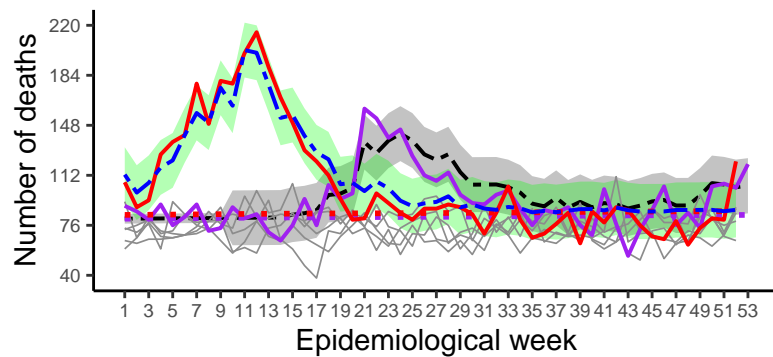

Amazonas (AM)

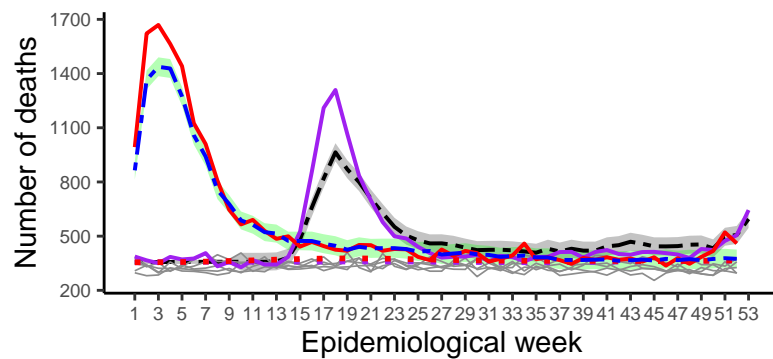

Roraima (RR)

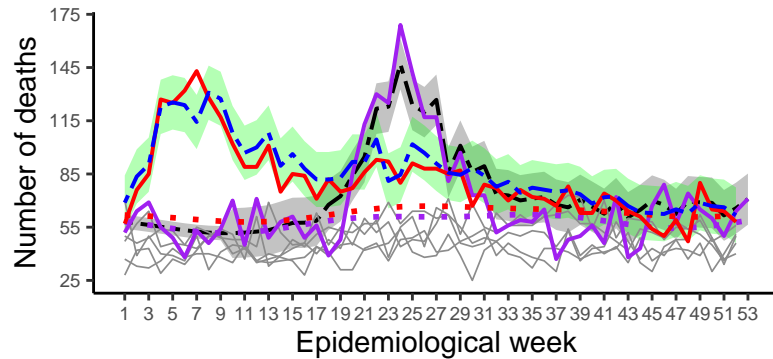

Pará (PA)

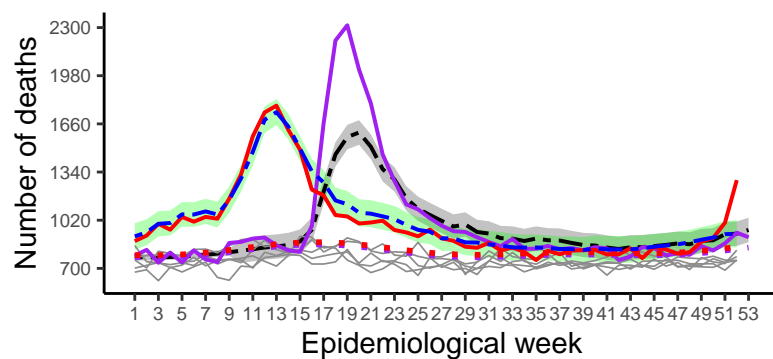

Amapá (AP)

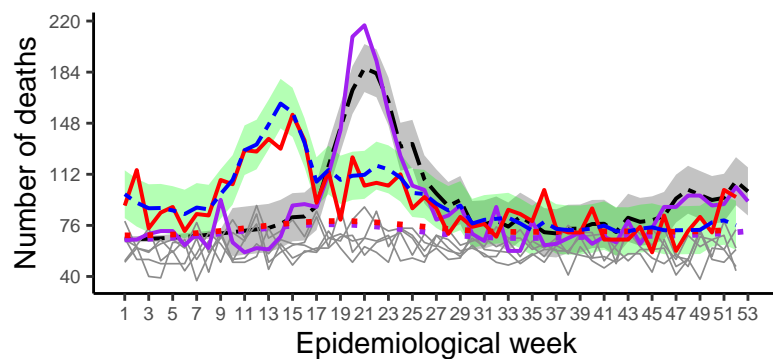

Tocantins (TO)

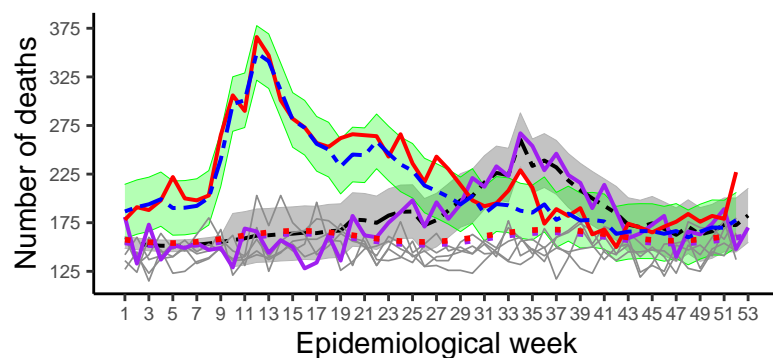

— 2015–2019 observed    ■ 2020 forecast    — 2020 observed    - - 2020 forecast+covid    ■ 2020 95% IP  
 ■ 2021 forecast    — 2021 observed    - - 2021 forecast+covid    ■ 2021 95% IP
